# Supplementary material for: Physical activity of first graders in Norwegian after-school programs: A relevant contribution to the development of motor competencies and learning of movements? Investigated utilizing a mixed methods approach
Source: PubMed Central journal article supplement (PMC7192409; doi:10.1371/journal.pone.0232486), 2020-04-30
Supplement: pone.0232486.s001.pdf [file pone.0232486.s001.pdf]

**Comment on each activity period**

| Nr. | Comment: |
|-----|----------|
| 1   |          |
| 2   |          |
| 3   |          |
| 4   |          |
| 5   |          |
| 6   |          |
| 7   |          |
| 8   |          |
| 9   |          |
| 10  |          |
| 11  |          |
| 12  |          |
| 13  |          |
| 14  |          |
| 15  |          |
